# On the estimation errors of $K_M$ and $V$ from time-course experiments using the Michaelis–Menten equation

Wylie Stroberg<sup>a</sup>, Santiago Schnell<sup>a,b,c,\*</sup>

<sup>a</sup>*Department of Molecular & Integrative Physiology, University of Michigan Medical School, Ann Arbor, MI 48109, USA*

<sup>b</sup>*Department of Computational Medicine & Bioinformatics, University of Michigan Medical School, Ann Arbor, MI 48109, USA*

<sup>c</sup>*Brehm Center for Diabetes Research, University of Michigan Medical School, Ann Arbor, MI 48105, USA*

---

## Abstract

The conditions under which the Michaelis–Menten equation accurately captures the steady-state kinetics of a simple enzyme-catalyzed reaction is contrasted with the conditions under which the same equation can be used to estimate parameters,  $K_M$  and  $V$ , from progress curve data. The conditions for the validity of the underlying assumptions leading to the Michaelis–Menten equation are shown to be necessary, but not sufficient to guarantee accurate estimation of  $K_M$  and  $V$ . Detailed error analysis and numerical “experiments” are used to show the required experimental conditions for the independent estimation of both  $K_M$  and  $V$  from progress curve experiments. It is found that, if the initial substrate concentration is of the same order of magnitude as  $K_M$ , the estimated values of the  $K_M$  and  $V$  will correspond to their true values calculated from the microscopic rate constants of the corresponding mass-action system.

*Keywords:* experimental design, parameter estimation, reproducibility, inverse problem.

---

\*Corresponding author.

*Email addresses:* [stroberg@umich.edu](mailto:stroberg@umich.edu) (Wylie Stroberg), [schnells@umich.edu](mailto:schnells@umich.edu) (Santiago Schnell)

August 5, 2016

## 1. Introduction

The fundamental equation of enzyme kinetics is the Michaelis–Menten (MM) equation, which relates the rate of an enzyme-catalyzed reaction to the concentration of substrate [1, 2]. The MM equation is nowadays derived using the steady-state assumption as proposed by Briggs and Haldane [3]. It is characterized by two parameters: the Michaelis constant,  $K_M$ , which acts as an apparent dissociation constant under the assumption of steady-state, and the limiting rate,  $V$  (or the catalytic constant,  $k_{\text{cat}}$  if the enzyme concentration is known) [4]. These parameters are often viewed as thermodynamic properties of an enzyme–substrate pair, and hence depend on conditions such as pH and temperature, but not on time-dependent enzyme nor substrate concentrations [5]. As a result, measuring  $K_M$  and  $V$  are essential to characterizing enzymatic reactions [6]. However, the treatment of  $K_M$  and  $V$  as constants with respect to enzyme and substrate concentrations relies on simplifying assumptions relating to the quasi-steady-state of the intermediate complex formed by the enzyme and substrate [7]. If conditions for the reaction lie outside the range for which the simplifying assumptions are valid,  $K_M$  becomes dependent on the concentration of the substrate, and hence, on time. Experiments to estimate  $K_M$  must be conducted under conditions for which the MM equation is valid [7, 8]. This can be problematic since it is generally necessary to know  $K_M$  a priori in order to insure the experimental conditions meet the requirements for the using MM equation. Additionally, values of  $K_M$  and  $V$  measured under valid experimental conditions can only be transferred to cases that also meet the requirements. Since this is often not the case in vivo, using values of  $K_M$  and  $V$  measured in vitro to predict the activity of an enzyme in living organisms can often be seriously unreliable [9].

The range of substrate and enzyme concentrations over which the MM equation can be applied has long history of theoretical investigation [see 8, for a recent review], and requires two assumptions be valid. The first, called the steady-state assumption, implies that the timescale for the formation of the intermediate complex is much faster than that of the conversion of the substrate into product [10]. The second, called the reactant-stationary assumption, implies that the fast, transient period in which the steady-state population of intermediate complex first forms, depletes only a negligible amount of substrate [11]. It has been shown that the reactant-stationary assumption is more restrictive and, if valid, the reaction velocity (after the ini-

38 tial transient period) will follow the MM equation and be well-characterized  
39 by the parameters  $K_M$  and  $V$  [10, 12, 8].

40 At first sight, it is tempting to assume that, when the MM equation is  
41 valid, experimental data should also yield accurate estimates of  $K_M$  and  $V$   
42 [13, 14]. However, the conditions for the validity of the steady-state and  
43 reactant-stationary assumptions are based on a forward problem, i.e. one in  
44 which the parameters are known. Estimating parameters from experimental  
45 data, on the other hand, is an inverse problem [15]. Extracting true values of  
46 parameters from data requires a stable and unique inverse mapping that is  
47 not guaranteed by the existence of a solution to the forward problem [see 16,  
48 for example]). Hence, even in cases where the assumptions underlying the  
49 MM equation are valid, and the MM equation accurately fits an experimental  
50 progress curve, the values of  $K_M$  and  $V$  estimated from the data may differ  
51 significantly from their true values.

52 In this work, we seek to address the issue of estimating parameters from  
53 progress curves of single-substrate, single-enzyme-catalyzed reactions quanti-  
54 tatively. In Section 2, we review the validity of the steady-state and reactant-  
55 stationary assumptions, and quantify errors incurred by making these as-  
56 sumptions. In Section 3, we discuss the inverse problem associated with  
57 estimating parameters based on the MM equation. Numerical experiments  
58 are then conducted in Section 4 to verify and quantify the range of exper-  
59 imental conditions that allow for veracious estimations of  $K_M$  and  $V$ . We  
60 conclude with a discussion of the results in Section 5.

## 61 **2. The forward problem: the Michaelis–Menten equation and the** 62 **conditions for its validity**

In the simplest, single-enzyme and single-substrate reaction, the enzyme  $E$  reacts with the substrate  $S$  to form an intermediate complex  $C$ , which then, under the action of the enzyme, forms a product  $P$  and releases the enzyme,

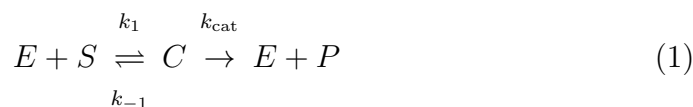

where  $k_1$  and  $k_{-1}$  are microscopic rate constants, and  $k_{\text{cat}}$  is the catalytic constant [4]. Applying the law of mass action to reaction mechanism (1)

yields four rate equations

$$\dot{e} = -k_1 es + k_{-1}c + k_{\text{cat}}c \quad (2a)$$

$$\dot{s} = -k_1 es + k_{-1}c \quad (2b)$$

$$\dot{c} = k_1 es - k_{-1}c - k_{\text{cat}}c \quad (2c)$$

$$\dot{p} = k_{\text{cat}}c, \quad (2d)$$

63 where lowercase letters represent concentrations of the corresponding up-  
64 percase species. Typically, in test tube enzyme binding assays the initial  
65 conditions are taken to be

$$(e, s, c, p) |_{t=0} = (e_0, s_0, 0, 0). \quad (3)$$

Additionally, the system obeys two conservation laws, the enzyme and substrate conservation laws,

$$e(t) + c(t) = e_0 \quad (4a)$$

$$s(t) + c(t) + p(t) = s_0. \quad (4b)$$

Using (4a) to decouple the enzyme concentrations, the redundancies in the system (2) are eliminated to yield

$$\dot{s} = -k_1(e_0 - c)s + k_{-1}c \quad (5a)$$

$$\dot{c} = k_1(e_0 - c)s - (k_{-1} + k_{\text{cat}})c \quad (5b)$$

66 where  $e(t)$  and  $p(t)$  are readily calculated once  $s(t)$  and  $c(t)$  are known. If,  
67 after an initial, rapid buildup of  $c$ , the rate of depletion of  $c$  approximately  
68 equals its rate of formation,  $c$  is assumed to be in a quasi-steady state [3],  
69 i.e.

$$\dot{c} \approx 0 \quad \text{for } t > t_c, \quad (6)$$

where  $t_c$  is the timescale associated with the initial transient buildup of  $c$  [10]. The steady-state assumption (6), in combination with (5), leads to

$$c = \frac{e_0 s}{K_M + s} \quad (7a)$$

$$\dot{s} = -\frac{V s}{K_M + s}, \quad (7b)$$

70 where  $V = k_{\text{cat}}e_0$  and  $K_M = (k_{-1} + k_{\text{cat}})/k_1$ . Hence, the system (2) is re-  
71 duced to an algebraic-differential equation systems with one single differ-  
72 ential equation for  $s$ . However, since (7) is only valid after the initial transient  
73 time period,  $t_c$ , a boundary condition for  $s$  at  $t = t_c$  must be supplied. To  
74 do this, it is assumed that very little substrate is consumed during the initial  
75 transient period (the reactant-stationary assumption) such that

$$s(t < t_c) \approx s_0, \quad (8)$$

76 which provides an initial condition for (5a) under the variable transformation  
77  $t \rightarrow t - t_c$ . Substituting (7a) into (2d), one obtains, the rate of the reaction (1)

$$\dot{p} = v = \frac{Vs}{K_M + s}, \quad (9)$$

78 relating the rate of product formation to the substrate concentration. Equa-  
79 tions (9) is the MM equations, and the system of equations (7a), (7b), and  
80 (9) govern the dynamics the complex, substrate, and product, respectively,  
81 under the steady-state assumption.

82 The conditions under which the steady-state assumption (6) and reactant-  
83 stationary assumption (8) are valid have been extensively studied. Segel [10]  
84 showed that the steady-state assumption is valid so long as

$$\frac{e_0}{K_M + s_0} \ll \left(1 + \frac{K_S}{K}\right) \left(1 + \frac{s_0}{K_M}\right), \quad (10)$$

85 where  $K_S = k_{-1}/k_1$ , and  $K = k_{\text{cat}}/k_1$ . For the reactant-stationary assump-  
86 tion to be valid, they derived the condition

$$\frac{e_0}{K_M} \ll \left(1 + \frac{s_0}{K_M}\right), \quad (11)$$

87 which is more stringent than condition (10), and hence dictates the conditions  
88 under which the MM equation can be applied. Interestingly, it has been  
89 shown that condition (11) is independent from (10) [11].

### 90 2.1. Quantitative analysis of the errors induced by the steady-state and reactant- 91 stationary assumptions

92 To gain a quantitative understanding of the inequalities expressed in (10)  
93 and (11), an accurate assessment of the difference between the solution to

94 system (5) and the reduced equations (7) is required. For our analysis, we  
95 compare progress curves of the substrate calculated with numerical solutions  
96 to the exact law of mass action system (5a) and the reduced equation (7b)  
97 under the steady-state assumption. Note that the reduced rate equation (7b)  
98 is effectively the MM equation for the substrate depletion. The *concentration*  
99 *error* as a function of time is calculated as

$$\text{error}(t) = \left| \frac{s(t) - s_{MM}(t)}{s_0} \right|, \quad (12)$$

100 where  $s_{MM}$  is the substrate concentration calculated using the reduced equa-  
101 tion (7b) and  $||$  denotes the absolute value. To form a scalar measure of  
102 the error, we use the maximal value of the concentration error over the time  
103 course of the reaction. Contours of the maximum concentration error in the  
104 plane of initial enzyme and substrate concentrations (normalized by  $K_M$ ) are  
105 shown in **Fig. 1**. Additionally, conditions (10) and (11) are plotted for the  
106 cases when the right-hand sides are ten times the left-hand sides to represent  
107 the much less condition numerically. For all values of  $\kappa = k_{-1}/k_{\text{cat}} = K_S/K$ ,  
108 condition (11) is sufficient to guarantee small errors when using the MM  
109 equation. However, **Fig. 1A** shows that when  $\kappa$  is small – implying the  
110 reverse step in reaction (1) is negligible – small values of  $s_0/K_M$  yield small  
111 errors, regardless of the initial enzyme concentration.

112 The observed errors can be understood by considering the influence of  
113 small  $\kappa$  and  $s_0/K_M$  on the system (5). When  $\kappa \ll 1$ , reaction (1) strongly  
114 favors the production for  $P$  from  $C$  as opposed to the disassociation of  $C$  back  
115 to  $E$  and  $S$ . This reduces the reaction mechanism (1) to the van Slyke–Cullen  
116 mechanism [17] as  $K_M \approx K$ . The requirement  $s_0/K_M \gg 1$  implies that the  
117 formation of  $C$  is slow compared to the formation  $P$  and the disassociation of  
118  $C$ . Taken together, these two requirements provide an ordering of timescales  
119 such that the formation of  $C$  is slow compared to the action of the enzyme  
120 to form  $P$ , but fast compared to the disassociation of the intermediate com-  
121 plex, effectively reducing the rate equation for the substrate depletion (5a) to  
122  $\dot{s} \approx -k_1 e_0 s$ . Similarly, under the same condition, the MM equation for sub-  
123 strate (7b) reduces to the same expression. Hence, under these conditions,  
124 the MM equation accurately represent the system dynamics, even though  
125 condition (11) is violated.

126 The condition for the validity of the reactant-stationary assumption (11)  
127 is a sufficient condition for the MM equation to be valid. In essence, this says  
128 that for a known set of parameter values, if the reactant-stationary assump-

129 tion is valid, the dynamics of the reduced system (7) will closely approximate  
130 the dynamics of the full system (5). However, the MM equation is often used  
131 to estimate  $K_M$  and  $V$  from experimental data, which requires solving an  
132 inverse problem. Solutions to the forward problem do not guarantee the  
133 existence or uniqueness of the inverse problem, hence it is not clear that  
134 the conditions for the validity of the reduced forward problem correspond to  
135 the conditions required to accurately estimate rate constants. This issue is  
136 investigated in the following section.

### 137 **3. The inverse problem: Estimation of $K_M$ and $V$**

138 The experimental estimation of the parameters  $K_M$  and  $V$  is used to  
139 characterize enzyme-catalyzed reactions. In general,  $K_M$  and  $V$  can be esti-  
140 mated through either initial rate experiments [see 18, for a recent review] or  
141 direct analysis of time course data [19]. In initial rate experiments, a series  
142 of enzyme assays with differing substrate concentrations are performed and  
143 initial reaction rates are calculated from the linear portion of the progress  
144 curve (after the initial fast transient,  $t_c$ , and before substrate depletion be-  
145 comes influential). The MM equation for either substrate or product is then  
146 fit to the initial rates as a function of initial substrate concentration, yielding  
147  $K_M$  and  $V$ . When time course data is used, the integrated implicit [20] or  
148 closed-form [21] of the MM equations are fit directly to time series through  
149 nonlinear regression, providing estimates for  $K_M$  and  $V$ . Although initial rate  
150 experiments are more commonly used, they require numerous assays with dif-  
151 ferent substrate concentrations to determine  $K_M$  and  $V$ . Alternatively, time  
152 course analyses have the advantage that  $K_M$  and  $V$  can be estimated from  
153 a single experiment, making them potentially much cheaper when expensive  
154 reactants are required, and less time consuming [22, 23, 24, 7]. Hence, in  
155 this work, we consider the problem of parameter estimation directly from  
156 progress curves, specifically, those for the concentration of substrate.

157 Inverse problems are typically formulated in terms of an operator,  $F$ ,  
158 mapping the space of parameters,  $Q$ , to the space of observations,  $Y$ , i.e.

$$F(q) = y, \quad (13)$$

159 where  $q \in Q$  is a vector of parameters, and  $y \in Y$  is a vector of observed  
160 quantities. In general,  $F = G \circ H$  is a composite of the solution operator  
161  $S$ , which maps a parameter vector  $q$  to a solution vector  $\bar{y}$  of the underlying

162 ordinary differential equation for the rate equations, and the observation  
163 operator  $R$ , which takes  $\bar{y}$  to the observable  $y$  [25]. For example, if fluorescent  
164 markers are used to tag substrate molecules, and fluorescent intensity is  
165 measured at times  $t_i$ ,  $G$  is then the mapping between the fluorescent intensity  
166 at times  $t_i$  and substrate concentration, and  $H$  is the solution to the rate  
167 equations (7).  $G$  effectively samples the solution to the rate equation model at  
168 the observation times and converts those concentrations to the experimental  
169 observables.

170 For the present study, we assume the concentrations are observed directly,  
171 hence  $G$  is simply a sampling of the integrated rate equations (5). Specifically,  
172 we consider the case in which the concentration of the substrate is measured  
173 at discrete times  $t_i$  and  $H$  is the solution to (7). The inverse problem consists  
174 of finding a parameter vector  $q$  solving (13). However, (13) is generally ill-  
175 posed due to experimental noise. Even in the absence of experimental error,  
176 the inverse problem will be ill-posed, because the MM equation only approx-  
177 imates the mass action rate equations (5), even when the steady-state and  
178 reactant-stationary assumptions are valid. The exact inverse problem must  
179 then be reformulated as a least-squares optimization problem to minimize  
180 the function

$$\|y - F(q)\|_Y^2, \quad (14)$$

181 where  $\|\cdot\|_Y$  is the  $L_2$  norm on  $Y$ . The sensitivity of (14) to changes in  
182 parameter values is measured by the local condition number for the first  
183 order optimality condition. The condition number is given by the ratio of  
184 the maximum and minimum eigenvalues of the matrix

$$J^*(q_*) J(q_*). \quad (15)$$

185 In the above expression,  $J$  is the Jacobian of the mapping  $F$ ,  $q_*$  is the  
186 “true” parameter vector and  $J^*$  denotes the conjugate transpose of  $J$ . Ill-  
187 conditioning implies small errors in the data (or model) can result in large  
188 errors in the estimated parameters. Although many features of a problem  
189 can affect the conditioning (such as proper choice of units) [26], of particular  
190 importance when fitting the MM equation is the correlation of the param-  
191 eters. When the parameters are highly correlated the model is incapable of  
192 uniquely determining the parameters because, as the correlation coefficient  
193 tends toward 1, the parameters become linearly dependent. In this case,  
194 at least one column of  $J$  will be approximately a linear combination of the  
195 others, and hence not invertible.



196 Effectively, this dictates when the mass action model (5), which depends  
197 on three parameters  $(k_1, k_{-1}, k_{\text{cat}})$ , reduces to the MM model (7) with pa-  
198 rameters  $(K_M, V)$ . Under experimental conditions for which the reactant  
199 stationary assumption is valid, it is not possible to estimate all three rate  
200 constants from the mass action model using time course data. Similarly,  
201 within the region of validity for the reactant stationary assumption, there  
202 are sub-regions in which  $\text{rank}(J) \approx 1$ , and hence prohibit estimation of both  
203  $K_M$  and  $V$  from time course data. To see where this rank deficiency occurs  
204 we consider two regions in the  $s_0/K_M - e_0/K_M$  plane. In both, the conditions  
205 for the validity of the reactant stationary assumption are met. Additionally,  
206 in the first case  $s_0 \ll K_M$ . Since  $s < s_0$  for all  $t$ , we can expand (5a) in  
207 powers of  $s/K_M$ . Truncating this expansion at order two leads to

$$\dot{s} = -\frac{Vs}{K_M} \left( 1 - \frac{s}{K_M} \right). \quad (16)$$

208 To lowest order,  $\dot{s}$  depends only on the ratio of  $V$  to  $K_M$ , and hence the  
209 inverse problem of finding both parameters from time course data will become  
210 extremely ill-conditioned at small substrate concentrations (see, **Fig. 2A**).

211 Next, consider the case in which the substrate is in great excess, i.e.  
212  $s_0 \gg K_M$ . Initially,  $s \approx s_0$ , allowing for an expansion of  $\dot{s}$  in powers of  
213  $K_M/s_0$ , which, to second order, gives

$$\dot{s} \approx -V \left( 1 - \frac{K_M}{s} \right). \quad (17)$$

214 Hence, so long as  $s \gg K_M$ , the substrate concentration will decrease linearly  
215 with rate  $-V$ . Eventually, the progress curve must deviate from the initial  
216 linearity, and presumably, this curvature should contain information about  
217  $K_M$ , allowing for both parameters to be estimated. However, if the time over  
218 which the progress curve is nonlinear is small, or equivalently, the initial linear  
219 regime very nearly approaches substrate depletion, parameter estimation will  
220 fail. Large  $s_0/K_M$  can be shown to imply this by comparing the timescale  
221 for significant substrate depletion,  $t_S$ , with the timescale of high curvature  
222  $t_Q$ . The substrate depletion timescale is given by [10]

$$t_S = \frac{\Delta s}{|\dot{s}_{\text{max}}|} = \frac{K_M + s_0}{V}. \quad (18)$$

223 The high-curvature timescale can be estimated with the aid of the second  
224 derivative of the substrate concentration,

$$\ddot{s} = \frac{V^2 K_M s}{(K_M + s)^3}. \quad (19)$$

225  $t_Q$  is defined as the ratio of the total change in velocity of the reaction to the  
226 maximum acceleration. The maximum acceleration, found by equating (19)  
227 with zero, occurs when  $s = K_M/2$  for  $s_0 \geq K_M/2$ , and  $s_0$  otherwise. Since  
228 the present analysis concerns high  $s_0/K_M$ , the high-curvature timescale is  
229 given by

$$t_Q = \frac{\Delta V}{\ddot{s}|_{s=K_M/2}} = \frac{27 K_M s_0}{4V (K_M + s_0)}, \quad (20)$$

230 where  $\Delta V$  is the change in reaction velocity through the region of curvature  
231 and is equal to  $V$ . Estimation of parameters from time course data will not  
232 be possible when  $t_Q \ll t_S$ , or, upon substitution of (18) and (20), when

$$\frac{4 \frac{s_0}{K_M}}{27 \left(1 + \frac{s_0}{K_M}\right)} \ll 1. \quad (21)$$

233 Therefore, as the initial substrate concentration is increased, the proportion  
234 of the time course that can yield information about  $K_M$  decreases, and mea-  
235 surements will require greater resolution in both time and concentration.  
236 **Fig. 2B** shows the condition number and the ratio of the substrate deple-  
237 tion timescale to the high-curvature timescale for a large range of  $s_0/K_M$ .  
238 At small values of  $s_0/K_M$ , ill-conditioning makes parameter extraction in-  
239 tractable, while at large  $s_0/K_M$ , measurements must be increasingly precise.  
240 Thus, substrate concentrations close to  $K_M$  are desirable when determining  
241 parameters.

#### 242 4. Numerical experiments

243 To demonstrate and quantify the regions in which the conditioning of the  
244 inverse problem is poor, and the necessary measurements become intractable,  
245 we present a systematic numerical analysis of progress curve experiments in  
246 this section.

247 *4.1. Methodology for numerical progress curve experiments*

248 Numerical experiments consist of first generating progress curve data from  
249 the mass action rate equations with a known set of rate constants. Then, the  
250 values of  $K_M$  and  $V$  corresponding to those rate constants are estimated by  
251 fitting the MM equations to the progress curve. To generate experimental  
252 progress curves it is necessary to choose a set of rate constants  $(k_1, k_{-1}, k_{\text{cat}})$ ,  
253 and experimental protocol. The experimental protocol consists of defining  
254 initial conditions,  $(s_0, e_0, c_0, p_0)$ , a time span for the experimental observation,  
255  $t_{\text{obs}}$ , and a sampling frequency  $\omega$ . The system of equations (5) are integrated  
256 numerically from  $t \in [0, t_{\text{obs}}]$  and substrate concentrations are recorded every  
257  $\omega^{-1}$  time units, leading to  $t_{\text{obs}} \omega$  data points  $\{s_i(t_i)\}$ .

The data is then fit using the numerically integrated form of (5a). The nonlinear regression used to calculate the parameters  $(K_M, V)$  is performed using the Levenberg–Marquardt algorithm as implemented in SciPy (version 0.17.1, <http://www.scipy.org>). In many cases, supplying good initial conditions for the optimizer used for the regression is crucial to finding accurate parameter estimates. Since, in actual experiments the values of  $K_M$  and  $V$  are not known a priori, we attempt to roughly estimate their values from the time course data to provide initial conditions for the optimization. To do this,  $\{s_i(t_i)\}$  is differentiated numerically by central differences to give approximate rates  $\{\dot{s}_i(t_i)\}$ . Then, using (5a), data at any two time points,  $t_i$  and  $t_j$  can be used to estimate the parameters through

$$K_M = \frac{(\dot{s}_j - \dot{s}_i) s_i s_j}{\dot{s}_i s_j - \dot{s}_j s_i} \quad (22)$$

$$V = \dot{s}_i \left( \frac{K_M}{s_i} + 1 \right). \quad (23)$$

258 In theory, any two points can be used to estimate  $K_M$  and  $V$ , however, it  
259 is best to use data for which the velocity is changing at that greatest rate.  
260 Hence, we additionally numerically calculate  $\{\ddot{s}_i(t_i)\}$  and choose the times  
261 directly on either side of the maximum to substitute into (22) and (23). To  
262 avoid using data points in the transient regime before the system reaches a  
263 quasi-steady state, we consider only the regime for which  $s(t_i) < s_0/2$ . For  
264 actual experiments, noise can make calculations of derivatives subject to large  
265 errors, hence smoothing techniques must be used. Additionally, numerous  
266 pairs of data points can be used to generate a distribution of estimates, which  
267 can then be averaged to give initial conditions for the optimization, similar to

268 [27]. Once the initial conditions for the optimization routine are established,  
269 the best-fit values of  $K_M$  and  $V$  can be systematically estimated.

270 We note that when experimental conditions do not lie in a region for  
271 which the reactant stationary assumption is valid, the above technique will  
272 naturally provide poor estimates for  $K_M$  and  $V$ . In these regions, we have  
273 also used the true values  $K_M$  and  $V$ , calculated from the known rate con-  
274 stants, as initial conditions. Both methods provide qualitatively similar re-  
275 sults throughout the regions of parameter space investigated here, and quan-  
276 titatively agree in the region for which the reactant stationary assumption is  
277 valid.

#### 278 4.2. *Errors in parameter estimates can be large even when the reactant sta-* 279 *tionary assumption is valid*

280 Despite the validity of the reactant stationary assumption being sufficient  
281 for the MM equation model to closely align with the solution to the mass  
282 action governing equations, the inverse problem does not provide accurate  
283 estimates for parameters within the same range. Fig. 3 shows errors in esti-  
284 mates of  $K_M$  and  $V$  for a wide range of  $e_0/K_M$  and  $s_0/K_M$ . Below and above  
285 the range plotted for  $s_0/K_M$ , the solutions become numerically unstable due  
286 to the conditioning problems discussed in Section 3. It is clear however, that  
287 even within the range defined by large and small values of  $s_0/K_M$ , signif-  
288 icant errors are present. At high  $s_0/K_M$  and  $e_0/K_M$ ,  $V$  can be accurately  
289 determined, but  $K_M$  begins to show significant deviation. This is anticipated  
290 from the high- $s_0/K_M$  approximation of the substrate rate equation, which  
291 depends only on  $V$ . Additionally, when  $s_0/K_M < 1$ , the error contours fol-  
292 low a line for which  $e_0 \approx s_0$ . The condition that enzyme concentration is  
293 small relative to that of the substrate was one of the earliest conditions for  
294 the validity of the MM equations derived from singular perturbation theory  
295 [28]. For the forward problem, Segel [10] showed this condition to be overly  
296 restrictive, yet it appears to be appropriate for the inverse problem.

297 An explanation for the condition  $e_0 \ll s_0$  can be found by comparing the  
298 integrated form of the MM substrate equation with an exponential progress  
299 curve that is the limiting solution to the MM equations as  $s_0/K_M$  approaches  
300 zero. The integrated closed-form of (7b), known as the Schnell–Mendoza  
301 equation [21], can be written explicitly in terms of the Lambert-W function

302 [29]

$$\frac{s(t)}{s_0} = \left(\frac{s_0}{K_M}\right)^{-1} W \left[ \frac{s_0}{K_M} e^{\left(\frac{s_0}{K_M} - \frac{V}{K_M}t\right)} \right]. \quad (24)$$

303 Expanding the above expression about zero and truncating at first order  
304 leads to

$$\frac{s(t)}{s_0} \approx e^{-\frac{k_{\text{cat}}e_0t}{K_M} \left(1 - \frac{s_0}{k_{\text{cat}}e_0t}\right)}, \quad (25)$$

305 where we have used the definition of  $V$  to explicitly show the dependence on  
306  $e_0$ . The exponential solution takes the form

$$\frac{s_{\text{exp}}(t)}{s_0} = e^{-\frac{k_{\text{cat}}e_0t}{K_M}}. \quad (26)$$

307 Comparing (25) and (26) shows that the correction provided by the MM so-  
308 lution over the exponential progress curve becomes decreasingly significant  
309 as  $e_0/s_0$  becomes large. **Fig 4A** compares the mean concentration errors  
310 between the best fit solutions and the “true” solutions for both the MM  
311 equation and an exponential fit. At small values of  $e_0/s_0$ , the MM equation  
312 provides a distinctly better fit than the exponential solution, allowing both  
313  $K_M$  and  $V$  to be estimated from a single progress curve. As  $e_0/s_0$  increases,  
314 the two fitting functions eventually provide the identical fits. This corre-  
315 sponds to an exponential increase in the variance of the estimated parame-  
316 ters (**Fig. 4B**), and indicates that only the ratio  $V/K_M$  can be determined  
317 in this range.

318 *4.3. Fitting the initial substrate concentration does not significantly alter es-*  
319 *timates of  $K_M$  and  $V$*

320 Even when the reactant stationary assumption is valid, a small amount  
321 of substrate will be consumed in the initial transient period. Hence, know-  
322 ing the substrate concentration at the start of the reaction may not exactly  
323 correspond to that at the start of the quasi-stead-state phase. Although this  
324 difference is small, it is not clear whether this can noticeably alter the esti-  
325 mation of  $K_M$  and  $V$ . Additionally, time course measurements often employ

326 optical techniques to collect concentration data. Without time consuming  
327 calibration curve experiments to relate the fluorescent intensity to concen-  
328 tration directly, only relative concentrations are known. For these reasons,  
329  $s_0$  can be treated as an additional unknown parameter for the regression  
330 analysis [30].

331 **Fig. 5** shows error contours for estimates of  $K_M$ ,  $V$  and  $s_0$  for different  
332 experimental conditions. Similar to when  $s_0$  is assumed known, the errors  
333 in  $K_M$  and  $V$  follow lines of constant  $e_0/s_0$  at low substrate concentration.  
334 Additionally, **Fig. 5C** shows that the best-fit value of  $s_0$  corresponds to  
335 the true value of the initial substrate concentration for conditions where the  
336 reactant stationary assumption is valid. These results indicate that including  
337  $s_0$  as a free parameter can yield similar information about the constants  $K_M$   
338 and  $V$ , even in those cases when no definite concentrations are known.

#### 339 4.4. Data noise further reduces the range of conditions providing accurate 340 estimates of $K_M$ and $V$

341 In any physical experiment, some finite amount of measurement error will  
342 be present. To understand how signal noise affects the estimation of  $K_M$  and  
343  $V$ , we add noise to the numerically-calculated solution of (5a) such that the  
344 data becomes

$$\{s_i(t_i)\}_\delta = \{s_i(t_i)\} + \eta(\delta), \quad (27)$$

345 where  $\eta$  is a pseudo-random number drawn from a Gaussian distribution of  
346 mean zero and standard deviation  $\delta$ . The data is then fit as described in  
347 Section 4.1. However, the noise in the data precludes the use of the method  
348 described for estimating good initial conditions for the solver. Without a  
349 smoothing procedure, the difference formulas (22) and (23) can lead to large  
350 errors. In order to eliminate possible uncertainty arising from the determi-  
351 nation of good initial guesses from experimental data, we chose the “true”  
352 values of  $K_M$  and  $V$  as the starting point for the optimization algorithm.

353 Contour plots of the errors in the estimated values of  $K_M$  and  $V$  for the  
354 case of  $\delta = 0.01$  are shown in **Fig. 6**. Qualitatively, they exhibit the same  
355 behavior as the noise-free error contours (**Fig. 3**), yet the magnitude of the  
356 error increases, shrinking the range of initial conditions for which the error  
357 will be below a given threshold. A meaningful characterization of the quality  
358 of a fit is the variance in the estimated model parameters. To calculate the  
359 variance of  $K_M$  and  $V$ , the covariance matrix is first calculated as

$$\text{Cov} = (\bar{J}^T \bar{J})^{-1}, \quad (28)$$

360 where  $\bar{J}$  is the Jacobian evaluated numerically at the terminal point of the  
361 optimization. The variance for  $K_M$  and  $V$  are then the diagonal elements  
362 of Cov. As shown in **Fig. 7**, the range of experimental conditions leading  
363 to precise estimates of  $K_M$  becomes significantly constrained when even a  
364 small amount of measurement error is present. Only in the region where  
365  $s_0/K_M \approx 1$  and  $e_0/K_M \ll 1$  are the estimated  $K_M$  values robust. At larger  
366 initial substrate concentrations, the noise in the data sufficiently smears the  
367 sharply curved region of the substrate progress curve, making extraction  
368 of  $K_M$  prone to uncertainty. At small initial substrate concentrations, the  
369 added noise reduces the distinction between the exponential and MM solution  
370 branches shown in **Fig. 4A**, making independent determination of  $K_M$  and  $V$   
371 more difficult. Hence, even with only slight measurement error the reliability  
372 of estimated parameters falls significantly as the ratio  $s_0/K_M$  departs from  
373 unity.

## 374 5. Discussion

375 It is now well established that the MM equation accurately captures the  
376 kinetics of simple enzyme-catalyzed reactions when the reactant-stationary  
377 assumption holds true. However, as we have shown here, this fact does not  
378 imply that  $K_M$  and  $V$  can be obtained from experimental progress curves  
379 conducted within the range of validity for the reactant stationary assumption.  
380 This highlights an important problem encountered in parameter estimation.  
381 Even when the MM equation very accurately fits the experimental data, the  
382 fitted parameters may not accurately represent their true values. Without  
383 a thorough analysis of the inverse problem, it is not possible to distinguish  
384 between good fits that provide poor parameter estimates, and good fits that  
385 accurately estimate parameter.

386 Most of the research done on the analysis of enzyme progress curves has  
387 focused on the nonlinear regression analysis and algorithms to fit progress  
388 curves data [31, 23, 19, 32]. Additional research has investigated the design of  
389 progress curve experiments from a computational and theoretical standpoint  
390 [33]. In these works, either experimental data is collected, or artificial data is  
391 generated by adding noise to numerical solutions the integrated MM equation  
392 for prescribed values of  $K_M$  and  $V$ . Then, the artificial data is fitted in  
393 order to estimate  $K_M$  and  $V$ . Although this procedure can identify values  
394 of  $K_M$  and  $V$  for which progress curves can be well-fit by the integrated  
395 MM equation, it makes no connection to the underlying microscopic rate

396 constants. Hence, these studies do not directly assess whether the predicted  
397 values of  $K_M$  and  $V$  are connected to their microscopic definitions. In the  
398 present study we have addressed this issue by extracting data from numerical  
399 solutions to the underlying mass-action system for prescribed microscopic  
400 rate constants, then comparing the predicted values of  $K_M$  and  $V$  with those  
401 derived from the prescribed values of  $k_1$ ,  $k_{-1}$ , and  $k_{cat}$ .

402 The detailed error analysis presented in this work provides guidelines for  
403 the ranges of experimental conditions allowing for true parameter estimation.  
404 Specifically, we see that, in order for both  $K_M$  and  $V$  to be derived from  
405 substrate progress curve measurements:

- 406 • The initial substrate concentration must be within approximately an  
407 order of magnitude of the Michaelis constant, that is  $s_0 = O(K_M)$ ,  
408 especially when significant noise is present in the data.
- 409 • When the initial substrate concentration is in great excess of the Michaelis  
410 constant, that is  $s_0 \gg K_M$ , a linear fit to the initial velocity will yield  
411  $V$ , but provide no information about  $K_M$ .
- 412 • When the initial substrate concentration is small compared to the  
413 Michaelis constant, that is  $s_0 < K_M$ , an exponential fit to the progress  
414 curve will provide an estimate for the ratio of  $V$  to  $K_M$ , but neither  
415 parameter independently.

416 The recommendations presented here coincide with those of Duggleby  
417 and Clarke [33], who recommend an initial substrate concentration of ap-  
418 proximately  $2.5K_M$ . However, we additionally provide error contours for  
419 parameters estimated from experiments conducted under conditions far from  
420 this optimal value. This analysis shows that reasonable estimates can be  
421 expected so long as the initial substrate concentration is within an order of  
422 magnitude of  $2.5K_M$ . Furthermore, noise in the data restricts this range to  
423 be significantly smaller than the theoretical range for the validity of the MM  
424 equation.

425 In general, since these requirements depend on  $K_M$ , they cannot be as-  
426 sessed before conducting an experiment. However, they do provide useful  
427 checks that can reduce the number of experiments required, especially when  
428 compared to parameter estimation based on initial rate experiments. If a  
429 progress curve for a given initial substrate concentration cannot be fit by an  
430 exponential, and has a curvature that can be resolved, nonlinear regression



431 of the progress curve will provide accurate estimates of both  $K_M$  and  $V$ . If,  
432 say, the progress curve can reasonably be fit by an exponential, a second  
433 experiment with substantially larger initial substrate concentration should  
434 be performed. Then, the second progress curve, so long as the increase in  
435 initial substrate concentration is great enough to surpass the substrate range  
436 for with the kinetics are exponential, should yield either a curve from which  
437 both parameters can be estimated, or a curve from which  $V$  can be esti-  
438 mated. Hence, the two experiments are sufficient to determine both  $K_M$   
439 and  $V$ . This is in contrast to initial rate experiments, which require a large  
440 number of experiments such that a curve of the initial reaction velocity as  
441 a function of  $s_0$  can be produced. For accurate measurement of  $K_M$  and  $V$   
442 from initial rate experiments, both large and small values of the substrate  
443 (relative to  $K_M$ ) must be used [14, 18]. Hence, progress curve analysis will  
444 always require fewer experiments than initial rate experiments. Additionally,  
445 if initial rate experiments are used, progress curve analysis can be used as  
446 a check the accuracy of the estimates. Values of  $K_M$  and  $V$  obtained from  
447 fitting (5a) to the initial rate data should correspond to those values obtained  
448 from progress curve analysis of the experiments for which the initial rates are  
449 intermediate between 0 and  $V$ .

450 In conclusion, this work both advocates and cautions the use of progress  
451 curve analysis in determining kinetic parameters for enzymatic reactions.  
452 Progress curve assays can greatly reduce the number of experiments (and  
453 hence the cost and quantity of reagents) needed, while still providing accurate  
454 measurements. However, it is essential to not conflate an accurate fit with  
455 an accurate estimate of  $K_M$  and  $V$ . If this is kept in mind, progress curve  
456 analysis has significant advantages over the use of initial rate experiments.

## 457 Acknowledgments

458 This work is supported by the University of Michigan Protein Folding  
459 Diseases Initiative.

## 460 References

- 461 [1] A. Cornish-Bowden, The origins of enzyme kinetics, FEBS Lett. 587  
462 (2013) 2725–2730.
- 463 [2] A. Cornish-Bowden, One hundred years of Michaelis-Menten kinetics,  
464 Persp. Sci. 4 (2015) 3–9.

- 465 [3] G. E. Briggs, J. B. S. Haldane, A note on the kinetics of enzyme action,  
466 Biochem. J. 19 (1925) 338–339.
- 467 [4] A. Cornish-Bowden, Current IUBMB recommendations on enzyme  
468 nomenclature and kinetics, Persp. Sci. 1 (2014) 74–87.
- 469 [5] D. L. Purich, Enzyme kinetics: Catalysis & Control: A reference of  
470 theory and best-practice methods, Academic Press, London, 2010.
- 471 [6] A. Cornish-Bowden, Analysis and interpretation of enzyme kinetic data,  
472 Persp. Sci. 1 (2014) 121–125.
- 473 [7] S. Schnell, P. K. Maini, A century of enzyme kinetics. Reliability of the  
474  $K_M$  and  $v_{\max}$  estimates, Comments Theor. Biol. 8 (2003) 169–187.
- 475 [8] S. Schnell, Validity of the Michaelis-Menten equation – Steady-state,  
476 or reactant stationary assumption: that is the question, FEBS J. 281  
477 (2014) 464–472.
- 478 [9] K. van Eunen, B. M. Bakker, The importance and challenges of in  
479 vivo-like enzyme kinetics, Persp. Sci. 1 (2014) 126–130.
- 480 [10] L. A. Segel, On the validity of the steady-state assumption of enzyme  
481 kinetics, Bull. Math. Biol. 50 (1988) 579–593.
- 482 [11] S. M. Hanson, S. Schnell, Reactant stationary approximation in enzyme  
483 kinetics, J Phys Chem A 112 (2008) 8654–8658.
- 484 [12] L. A. Segel, M. Slemrod, The quasi-steady-state assumption: a case  
485 study in perturbation, SIAM Rev. 31 (1989) 446–477.
- 486 [13] R. G. Duggleby, J. F. Morrison, Experimental designs for estimating  
487 the kinetic parameters for enzyme-catalysed reactions, J. Theor. Biol.  
488 81 (1979) 671–684.
- 489 [14] R. J. Ritchie, T. Prvan, A simulation study on designing experiments  
490 to measure the  $K_M$  of the Michaelis–Menten kinetics curves, J. theor.  
491 Biol. 178 (1996) 239–254.
- 492 [15] J. A. Jacquez, The inverse problem for compartmental systems, Math.  
493 Comput. Simulation 24 (1982) 452–459.

- 494 [16] W. Stroberg, S. Schnell, On the validity and errors of the pseudo-first-  
495 order kinetics in ligand-receptor binding, *bioRxiv* (2016) 051136.
- 496 [17] D. D. Van Slyke, G. E. Cullen, The mode of action of urease and of  
497 enzymes in general, *J. Biol. Chem.* 19 (1914) 141–180.
- 498 [18] H. Bisswanger, *Enzyme assays*, *Persp. Sci.* 1 (2014) 41–55.
- 499 [19] C. T. Goudar, J. R. Sonnad, R. G. Duggleby, Parameter estimation  
500 using a direct solution of the integrated Michaelis–Menten equation,  
501 *Biochim. Biophys. Acta* 1429 (1999) 377–383.
- 502 [20] A. Cornish-Bowden, *Fundamentals of enzyme kinetics*, third edition ed.,  
503 Portland Press, London, 2004.
- 504 [21] S. Schnell, C. Mendoza, Closed form solution for time-dependent enzyme  
505 kinetics, *J. theor. Biol.* 187 (1997) 207–212.
- 506 [22] R. G. Duggleby, J. F. Morrison, The analysis of progress curves for  
507 enzyme-catalysed reactions by non-linear regression, *Biochim. Biophys.*  
508 *Acta* 481 (1977) 297–312.
- 509 [23] R. G. Duggleby, Analysis of enzyme progress curves by nonlinear regre-  
510 sion, *Methods Enzymol.* 249 (1995) 61–90.
- 511 [24] S. Schnell, C. Mendoza, A fast method to estimate kinetic constant for  
512 enzyme inhibitors, *Acta Biotheor.* 49 (2001) 109–113.
- 513 [25] H. W. Engl, C. Flamm, P. Kügler, J. Lu, S. Müller, P. Schuster, Inverse  
514 problems in systems biology, *Inverse Problems* 25 (2009) 123014, 51.
- 515 [26] P. L. Bonate, *Pharmacokinetic-Pharmacodynamic Modeling and Simu-  
516 lation*, Springer, New York, 2011.
- 517 [27] T. L. Toulas, C. P. Kitsos, Fitting the Michaelis–Menten model, *J.*  
518 *Comput. Appl. Math.* 296 (2016) 303–319.
- 519 [28] F. G. Heineken, H. M. Tsuchiya, R. Aris, On the mathematical status  
520 of the pseudo-steady hypothesis of biochemical kinetics, *Math. Biosci.*  
521 1 (1967) 95–113.

- 522 [29] R. M. Corless, G. H. Gonnet, D. E. G. Hare, D. J. Jeffrey, D. E. Knuth,  
523 On the Lambert  $W$  function, *Adv. Comput. Math.* 5 (1996) 329–359.
- 524 [30] F. G. Heineken, H. M. Tsuchiya, R. Aris, On the accuracy of determining  
525 rate constants in enzymatic reactions, *Math. Biosci.* 1 (1967) 115–141.
- 526 [31] R. G. Duggleby, A nonlinear regression program for small computers,  
527 *Anal. biochem.* 110 (1981) 9–18.
- 528 [32] R. G. Duggleby, Quantitative analysis of the time courses of enzyme-  
529 catalyzed reactions, *Methods* 24 (2001) 168–174.
- 530 [33] R. G. Duggleby, R. B. Clarke, Experimental designs for estimating the  
531 parameters of the Michaelis-Menten equation from progress curves of  
532 enzyme-catalysed reactions, *Biochim. Biophys. Acta* 1080 (1991) 231–  
533 236.

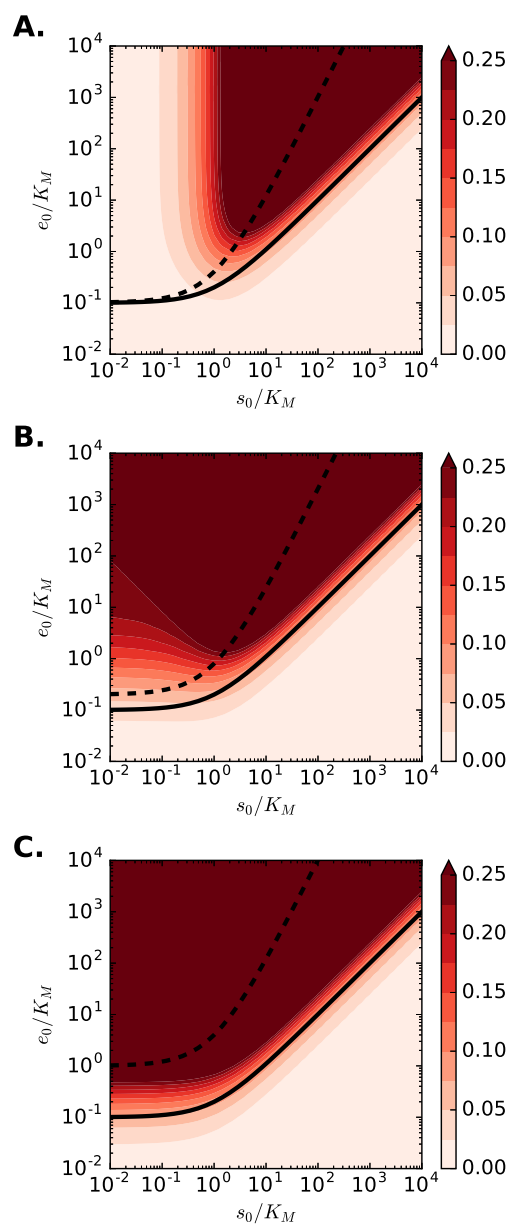

Figure 1: **Concentration error contours in the  $e_0/K_M$ - $s_0/K_M$  plane.** The maximal concentration errors are plotted in the plane of initial enzyme and substrate concentrations, normalized by  $K_M$ . The dashed black line corresponds to the condition for steady-state assumption (10), while the solid black line corresponds to the reactant stationary condition (11). Each panel shows different values of  $K_S$  and  $K$ , while  $K_M = 1$  for all cases. Panel **A**:  $K_S = 0.1, K = 0.9$ ; Panel **B**:  $K_S = 0.5, K = 0.5$ ; Panel **C**:  $K_S = 0.9, K = 0.1$ .

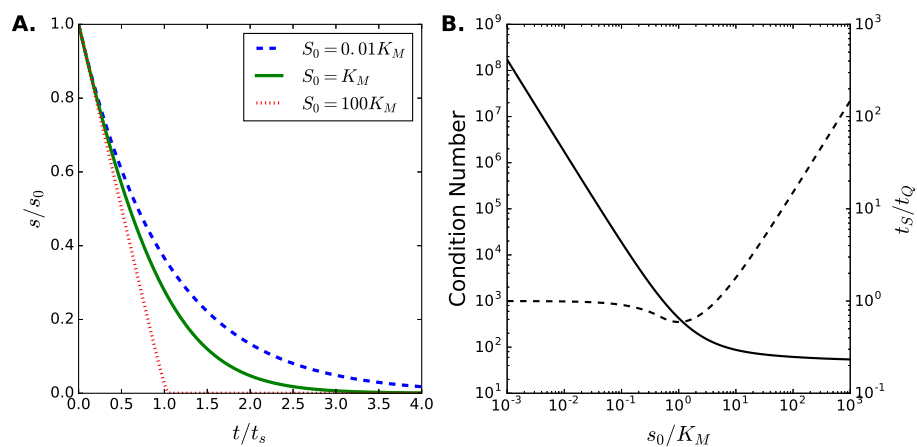

Figure 2: **(A) Substrate progress curves for high, intermediate and low initial substrate concentrations.** Substrate concentrations for differing values of  $S_0/K_M$  are plotted as a function of time. When the initial substrate concentration is large (red dotted line) the substrate depletion is linear until nearly all substrate has been depleted. With low initial substrate concentration (blue dashed line), the depletion follows a simple exponential. At intermediate values, the concentration follows the full hyperbolic rate law and both  $K_M$  and  $V$  can be uniquely identified through regression. For all curves,  $V = 10^{-2} \text{ M sec}^{-1}$ . **(B) Condition number (solid line) and timescale ratio  $t_S/t_Q$  as functions of the  $s_0/K_M$ .** At small values of  $s_0/K_M$ , the inverse problem becomes ill-conditioned. At large values of  $s_0/K_M$ , the region of the progress curve providing information about  $K_M$  becomes increasingly small.

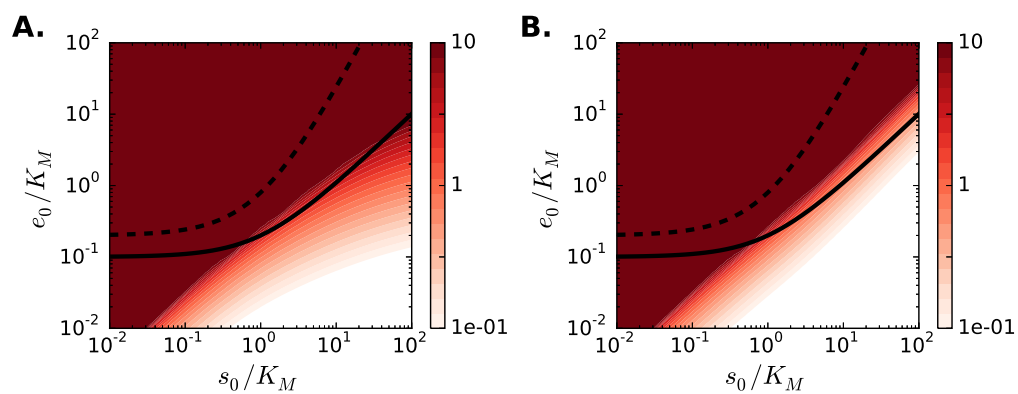

Figure 3: **Error contours of the estimated values  $K_M$  and  $V$ .** Errors in the predicted values of  $K_M$  and  $V$  for different initial substrate and enzyme concentrations are shown to deviate from the conditions for the validity of the reactant stationary assumption (shown as the solid line). The dashed line corresponds to condition (10). For  $s_0/K_M$  values lower than  $10^{-2}$  and greater than  $10^2$ , the fitting algorithm becomes unstable. Note that the color bar scale is logarithmic, showing errors can be significant. In this figure,  $K_S = K = 10$ .

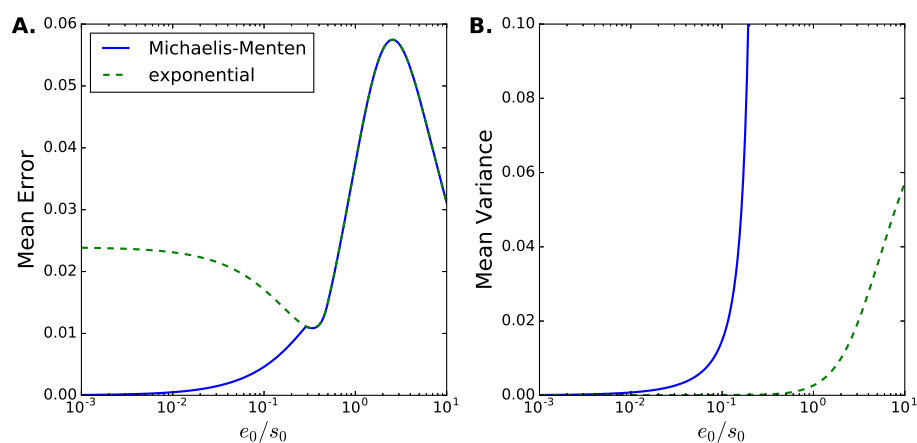

Figure 4: **(A) Mean concentration error, and (B) Mean variance in estimated parameters for the Michaelis–Menten equation and an exponential model.** For initial enzyme concentrations smaller than initial substrate concentrations, the Michaelis–Menten equation provides a noticeably better approximation of the true progress curve than does the exponential model, allowing for both  $V$  and  $K_M$  to be uniquely determined. Parameters for the case shown are:  $(k_1, k_{-1}, k_{\text{cat}}) = (1.0, 0.5, 0.5)$ ,  $t_{\text{obs}} = 3t_s$ ,  $\omega = t_{\text{obs}}/1000$ ,  $s_0 = 1$ .



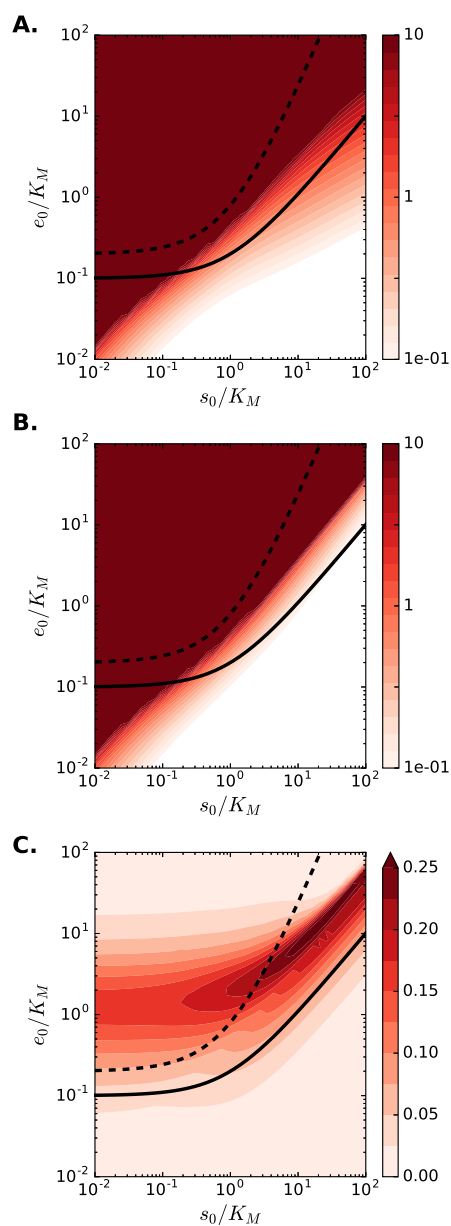

Figure 5: **Error contours when initial substrate concentration,  $s_0$ , is estimated from data.**  $K_M$  and  $V$  prediction errors (panels **A** and **B**, respectively) are qualitatively the same as those found when  $s_0$  is known a priori. The error in estimating  $s_0$  follows the reactant stationary condition, as well as providing accurate estimates when initial enzyme concentration is high and initial substrate concentration is low. Parameters for the case shown are:  $(k_1, k_{-1}, k_{\text{cat}}) = (1.0, 0.5, 0.5)$ ,  $t_{\text{obs}} = 3t_s$ ,  $\omega = t_{\text{obs}}/100$ .

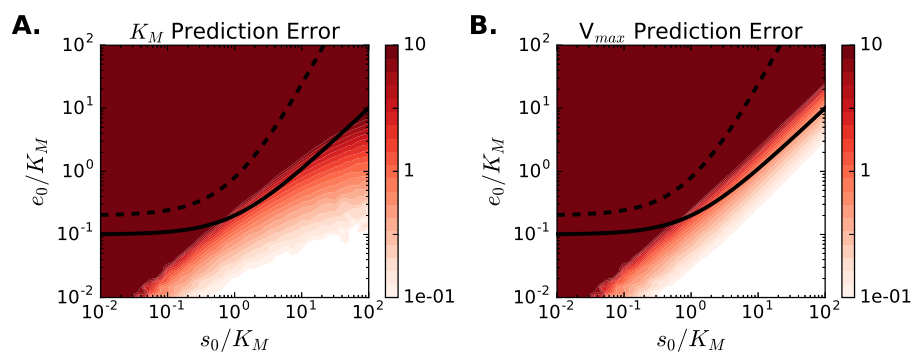

Figure 6: **Error contours for data with Gaussian noise.** When noise is added to the simulated data ( $\delta = 0.01$ ), errors in the estimated parameters worsen compared to noise-free data. Parameters for the case shown are:  $(k_1, k_{-1}, k_{cat}) = (1.0, 0.5, 0.5)$ ,  $t_{obs} = 3t_s$ ,  $\omega = t_{obs}/1000$ .

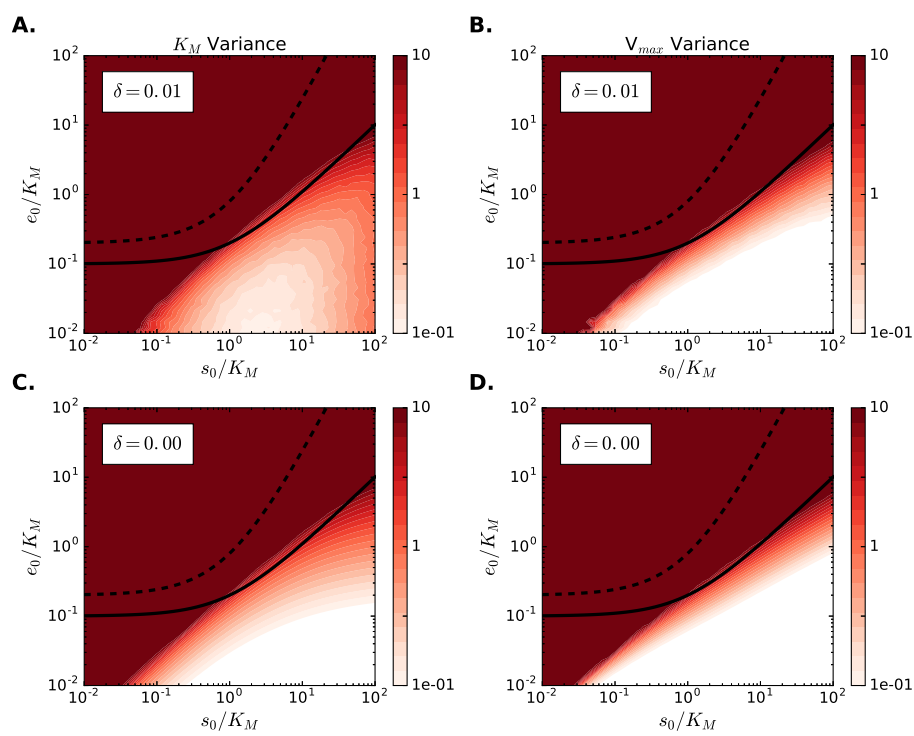

Figure 7: **Computed parameter variance for noisy and noise-free data.** Estimated variance in the parameters  $K_M$  (Panels **A** and **C**) and  $V$  (Panels **B** and **D**) for cases with  $\delta = 0.01$  (**A** and **B**) and no noise (**C** and **D**). Even a small amount of noise restricts the range of conditions providing robust parameter estimates. Parameters for the case shown are:  $(k_1, k_{-1}, k_{\text{cat}}) = (1.0, 0.5, 0.5)$ ,  $t_{\text{obs}} = 3t_s$ ,  $\omega = t_{\text{obs}}/1000$ .
